# Supplementary material
Source: PubMed Central journal article supplement (PMC3114464)
Supplement: bi200369p_si_001.pdf [file bi200369p_si_001.pdf]

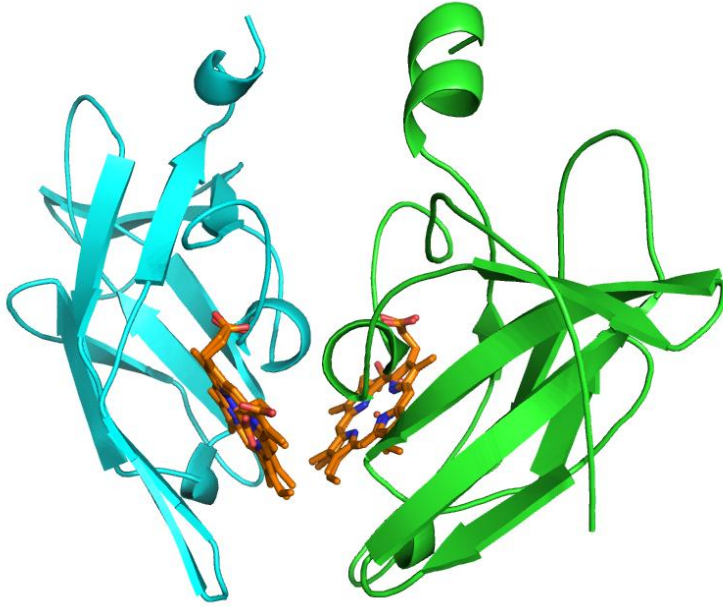

**Supplementary Figure 1. Heme pockets in adjacent molecules are closely juxtaposed.** Due to close contacts between heme pocket faces, the vinyl groups of protoporphyrin IX are as little as 3 Å apart. The  $\alpha 2$  helices are also close; the Met362 residue on each is in a complementary configuration to the other, such that one mainly juts inwards to coordinate heme-iron, and one mainly juts outwards, towards the other molecule. Chains A (cyan) and B (green) are shown as representative of the asymmetric unit.
